# Supplementary material
Source: publisher site journal article supplement (https://www.dovepress.com/article/546761)
Supplement: Supplementary file 1 [file 546761%20Revised%20%2509Supplementary.docx]

# Supplementary

eTable 1. Overview of diagnosis and procedure codes

| Disease/Procedure | ICD-10 or NOMESCO |
| --- | --- |
| 1. Amyloidosis | ICD-10: DE85x |
| - Amyloidosis | ICD-10: DE85 |
| - Non-neuropathic hereditary amyloidosis | ICD-10: DE850 (DE850A excluded) |
| - Hereditary nerve-amyloidosis | ICD-10: DE851 |
| - Amyloidosis with polyneuropathy | ICD-10: DE851A |
| - Hereditary amyloidosis, unspecified | ICD-10: DE852 |
| - Secondary systemic amyloidosis | ICD-10: DE853 |
| - Organ-limited amyloidosis | ICD-10: DE854 |
| - Other amyloidosis | ICD-10: DE858 |
| - Light chain amyloidosis | ICD-10: DE858A |
| - Amyloidosis, unspecified | ICD-10: DE859 |
| 2. Spinal stenosis | ICD-10: DM480 |
| 3. Knee arthrosis | ICD-10: DM17x |
| 4. Hip arthrosis | ICD-10: DM16x |
| 5. Achilles tendon rupture | ICD-10: DS860 DS860A |
| 6. Biceps tendon rupture | ICD-10: DS461X, DS462X |
| 7. Rotator-cuff tendon rupture | ICD-10: DS460x, DS467B1, DS467D1, DM751C. |
| 8. Carpal tunnel syndrome | ICD-10: G56.0 NOMESCO: KACC51, KACC61 |
| 9. Heart failure | ICD-10: I110, I130, I132, I50x |
| 10. Cardiomyopathy | ICD-10: I421, I422, I425, I428, I429, I431, I438, I517C |
| 11. Pacemaker/ICD | NOMESCO: BFCA0x, BFCA6x, BFCB0, BFCB6 |
| 12. Atrial fibrillation or flutter | ICD-10: I48x |
| 13. Any ATTRwt-associated orthopedic disease | Any of ICD-10/NOMESCO for disease-/procedure 2-8 |
| 14. Any ATTRwt-associated cardiac disease | Any of ICD-10/NOMESCO for disease-/procedure 9-12 |

**eTable 2.** Overview of the positive predictive value of amyloidosis or amyloidosis subtypes confirmed by medical record review for each ICD-10 amyloidosis diagnosis group in the Danish National Patient Registry

|  | **All registered with any amyloidosis diagnosis code (E85x)** | | **Hereditary amyloidosis without neurologic symptoms (E850) +**  **Hereditary nerve amyloidosis (E851)**  **+ Hereditary amyloidosis UNS (E852)** | | **Amyloidosis with polyneuropathy (E851A)** | | **Secondary systemic amyloidosis (E853)** | | **Localized amyloidosis (E854)** | | **AL amyloidosis (E858A)** | | **Amyloidosis UNS (E859)** | |
| --- | --- | --- | --- | --- | --- | --- | --- | --- | --- | --- | --- | --- | --- | --- |
| Confirmed / total | PPV | Confirmed / total | PPV | Confirmed / total | PPV | Confirmed / total | PPV | Confirmed / total | PPV | Confirmed / total | PPV | Confirmed / total | PPV |
| Amyloidosis overall | 313 / 334 | 94 (91–96) | 11 / 14 | 33 (6–79) | 5> / 7 | - | 5 / 6 | 83 (44–97) | 15 / 15 | 100 (80–100 | 49 / 50 | 98 (90–99) | 224 / 234 | 96 (92–98) |
| ATTRwt | 217 / 334 | 65 (60–79) | 5> /14 | - | 5> / 7 | - | 5> / 6 | - | 6 / 15 | 42 (20–64) | 5> / 50 | - | 200 / 234 | 85 (80–90) |
| AL amyloidosis | 78 / 334 | 23 (19–28) | 5> / 14 | - | 5> / 7 | - | 5> / 6 | - | 8 / 15 | 53 (30–75) | 45 / 50 | 90 (79–96) | 19 / 234 | 8 (5–12) |
| ATTRv | 11 / 334 | 3 (2–6) | 8 / 14 | 57 (33–79) | 5> / 7 | - | 5> / 6 | - | 5> / 15 | - | 5> / 50 | - | 5> / 234 | - |
| Other non-prespecified subtypes | 7 / 334 | 2 (1–4) | 5> / 14 | - | 5> / 7 | - | 5> / 6 | - | 5> / 15 | - | 5> / 50 | - | 5> / 234 | - |

**Abbreviations**: AL, amyloid light chain; ATTRv, variant transthyretin amyloidosis; ATTRwt, wild-type transthyretin amyloidosis; PPV, positive predictive value; UNS, unspecified

PPV is shown with estimate (95% confidence interval).

All results with less than 5 observations are not specified.

DE85 (Amyloidosis) and DE858 (Other amyloidosis) not specified due to fewer than 5 total registrations, and DE850A (Familial Mediterranean fever) was excluded by design.

All ICD-10 amyloidosis diagnosis groups are: Primary or secondary, inpatient or outpatient ICD-10 diagnoses.
